# Supplementary material for: Tunable electronic structure and magnetic moment in C2N nanoribbons with different edge functionalization atoms
Source: Royal Society of Chemistry journal article supplement (doi:10.1039/c7cp01359k), 2017-01-01
Supplement: c7cp01359k1.pdf [file c7cp01359k1.pdf]

Electronic Supplementary Information

## Tunable the electronic structure and magnetic moment of the C<sub>2</sub>N nanoribbons with different edge functionalization atoms

Yusheng Wang<sup>1,3\*</sup>, Nahong Song<sup>2,3</sup>, Min Jia<sup>1</sup>, Dapeng Yang<sup>1</sup>, Yuye Yang<sup>2</sup>, Chikowore

Panashe<sup>a</sup>, Jianjun Wang<sup>4</sup>

1) College of Mathematics and Information Science, North China University of Water Resources and Electric Power, Zhengzhou, Henan, 450011, China

2) College of computer and information engineering, and university of economics and law, Zhengzhou, Henan, 450000, China

3) International Joint Research Laboratory for Quantum Functional Materials of Henan, and School of Physics and Engineering, Zhengzhou University, Zhengzhou 450001, China

4) College of Science, Zhongyuan University of Technology, Zhengzhou 450007, China

**Table S1.** The lattice constants (Å), the C–C–N bond angle ( $\alpha$ ), the C–N–C bond angle( $\beta$ ), the C–C–C bond angle( $\gamma$ ), bond length (Å)in pristine and saturated systems

| system   | Z-C <sub>2</sub> NNR |                |               |                |                  |                  | A1-C <sub>2</sub> NNR | A2-C <sub>2</sub> NNR |
|----------|----------------------|----------------|---------------|----------------|------------------|------------------|-----------------------|-----------------------|
|          | b                    | $\alpha$ (deg) | $\beta$ (deg) | $\gamma$ (deg) | d <sub>C-N</sub> | d <sub>C-C</sub> | a <sub>1</sub>        | a <sub>2</sub>        |
| sheet    | 14.428               | 118.836        | 117.620       | 119.980        | 1.336            | 1.469            | 8.330                 | 8.330                 |
| pristine | 14.470               | 137.20         | 163.110       | 123.100        | 1.238            | 1.382            | 8.359                 | 8.364                 |
| H        | 14.428               | 120.67         | 120.980       | 120.410        | 1.321            | 1.443            | 8.332                 | 8.333                 |
| O        | 14.420               | 113.400        | 111.763       | 114.466        | 1.359            | 1.527            | 8.340                 | 8.343                 |
| F        | 14.437               | 124.24         | 126.780       | 123.620        | 1.304            | 1.449            | 8.334                 | 8.334                 |
| OH       | 14.429               | 115.055        | 112.376       | 118.630        | 1.346            | 1.530            | 8.338                 | 8.336                 |
| OF       | 14.438               | 116.087        | 109.822       | 122.888        | 1.344            | 1.517            | 8.339                 | 8.334                 |

**Table S2.** The different direction diameter ( $d_1$ ,  $d_2$ ,  $d_3$ ) of the inscribed circle formed by the nitride atoms in pristine and saturated systems for a series of ribbon widths

| Width | C <sub>2</sub> NNR | Z-C <sub>2</sub> NNR |           |           | A1-C <sub>2</sub> NNR |           |           | A2-C <sub>2</sub> NNR |           |           |
|-------|--------------------|----------------------|-----------|-----------|-----------------------|-----------|-----------|-----------------------|-----------|-----------|
|       |                    | $d_1$ (Å)            | $d_2$ (Å) | $d_3$ (Å) | $d_1$ (Å)             | $d_2$ (Å) | $d_3$ (Å) | $d_1$ (Å)             | $d_2$ (Å) | $d_3$ (Å) |
| 1     | Pristine           | 6.636                | 5.576     | 5.689     | 5.568                 | 5.540     | 5.542     | 5.585                 | 5.615     | 5.611     |
|       | H                  | 5.545                | 5.491     | 5.496     | 5.519                 | 5.497     | 5.494     | 5.519                 | 5.516     | 5.515     |
|       | O                  | 5.400                | 5.601     | 5.579     | 5.533                 | 5.528     | 5.522     | 5.541                 | 5.532     | 5.525     |
|       | F                  | 5.698                | 5.579     | 5.578     | 5.522                 | 5.508     | 5.549     | 5.519                 | 5.517     | 5.514     |
|       | OH                 | 5.507                | 5.547     | 5.545     | 5.523                 | 5.504     | 5.498     | 5.525                 | 5.518     | 5.514     |
|       | OF                 | 5.328                | 5.600     | 5.596     | 5.529                 | 5.512     | 5.502     | 5.519                 | 5.517     | 5.519     |
| 2     | Pristine           | 6.116                | 5.591     | 5.599     | 5.543                 | 5.535     | 5.521     | 5.553                 | 5.599     | 5.600     |
|       | H                  | 5.541                | 5.513     | 5.509     | 5.520                 | 5.499     | 5.511     | 5.518                 | 5.526     | 5.516     |
|       | O                  | 5.511                | 5.572     | 5.562     | 5.526                 | 5.525     | 5.517     | 5.529                 | 5.518     | 5.526     |
|       | F                  | 5.630                | 5.549     | 5.551     | 5.521                 | 5.502     | 5.514     | 5.519                 | 5.525     | 5.513     |
|       | OH                 | 5.520                | 5.533     | 5.536     | 5.524                 | 5.504     | 5.514     | 5.521                 | 5.515     | 5.526     |
|       | OF                 | 5.441                | 5.554     | 5.561     | 5.524                 | 5.508     | 5.517     | 5.519                 | 5.512     | 5.530     |
| 3     | Pristine           | 6.123                | 5.583     | 5.576     | 5.534                 | 5.532     | 5.521     | 5.541                 | 5.598     | 5.601     |
|       | H                  | 5.526                | 5.516     | 5.509     | 5.519                 | 5.504     | 5.509     | 5.519                 | 5.521     | 5.530     |
|       | O                  | 5.512                | 5.575     | 5.568     | 5.523                 | 5.511     | 5.528     | 5.526                 | 5.525     | 5.520     |
|       | F                  | 5.621                | 5.549     | 5.544     | 5.520                 | 5.506     | 5.511     | 5.519                 | 5.524     | 5.514     |
|       | OH                 | 5.503                | 5.530     | 5.533     | 5.520                 | 5.506     | 5.510     | 5.521                 | 5.525     | 5.523     |
|       | OF                 | 5.543                | 5.550     | 5.551     | 5.521                 | 5.515     | 5.508     | 5.520                 | 5.526     | 5.525     |
| 4     | Pristine           | 6.125                | 5.578     | 5.559     | 5.531                 | 5.525     | 5.532     | 5.519                 | 5.542     | 5.552     |
|       | H                  | 5.536                | 5.517     | 5.500     | 5.519                 | 5.509     | 5.506     | 5.518                 | 5.528     | 5.532     |
|       | O                  | 5.507                | 5.578     | 5.565     | 5.523                 | 5.528     | 5.530     | 5.524                 | 5.525     | 5.526     |
|       | F                  | 5.621                | 5.550     | 5.541     | 5.519                 | 5.507     | 5.511     | -----                 | -----     | -----     |
|       | OH                 | 5.511                | 5.537     | 5.523     | 5.520                 | 5.503     | 5.513     | 5.521                 | 5.527     | 5.520     |
|       | OF                 | 5.444                | 5.554     | 5.541     | 5.520                 | 5.510     | 5.515     | -----                 | -----     | -----     |

**Table S3.** The energy differences of FM and AFM1, AFM2, and AFM3 with respect to NM phase for Z-C<sub>2</sub>NNR, taking the energy of NM phase as zero

| Magnetic phase | Magnetic ordering |        | Energy (meV) |
|----------------|-------------------|--------|--------------|
|                | Edge 1            | Edge 2 |              |
| NM             |                   |        | 0            |
| FM             | ↑ ↑               | ↑ ↑    | -523.77      |
| AFM1           | ↑ ↑               | ↓ ↓    | -497.5       |
| AFM2           | ↑ ↓               | ↑ ↓    | -517.34      |
| AFM3           | ↑ ↓               | ↓ ↑    | -498.91      |

**Table S4.** The calculated binding energy  $E_b$ (eV) of C<sub>2</sub>NNRs with H, O and F saturated for a series of ribbon widths

| C <sub>2</sub> NNR<br>Width | Z-C <sub>2</sub> NNR |       |       | A1-C <sub>2</sub> NNR |       |       | A2-C <sub>2</sub> NNR |       |       |
|-----------------------------|----------------------|-------|-------|-----------------------|-------|-------|-----------------------|-------|-------|
|                             | H                    | O     | F     | H                     | O     | F     | H                     | O     | F     |
| 1                           | 4.142                | 7.402 | 5.146 | 5.371                 | 7.431 | 5.332 | 5.065                 | 6.952 | 4.321 |
| 2                           | 4.154                | 7.421 | 5.161 | 5.376                 | 7.435 | 5.336 | 5.068                 | 6.954 | 4.348 |
| 3                           | 4.158                | 7.421 | 5.162 | 5.376                 | 7.435 | 5.337 | 5.071                 | 6.957 | 4.351 |
| 4                           | 4.158                | 7.422 | 5.162 | 5.378                 | 7.438 | 5.337 | 4.796                 | 6.681 | 1.962 |

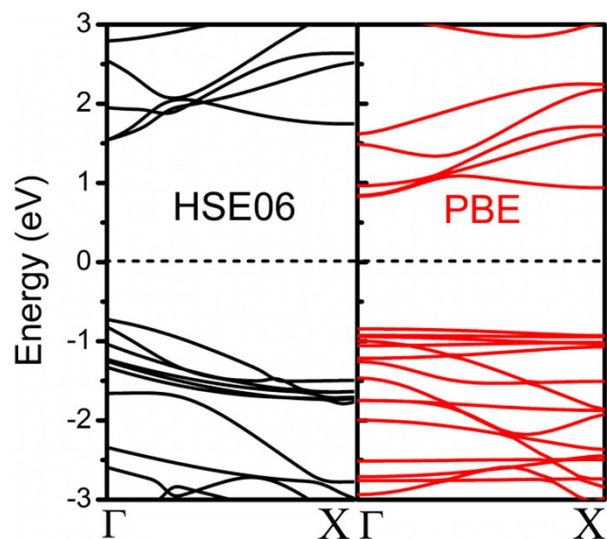

**Figure S1.** The band structure of H saturated Al-C<sub>2</sub>NNR calculated by HSE06 and PBE method respectively.

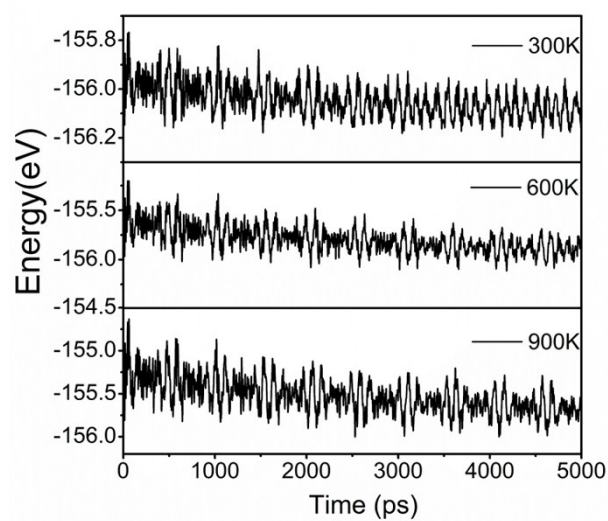

**Figure S2.** Relationships of total energy and time during 300K, 600K and 900K MD simulations of monolayer C<sub>2</sub>N.

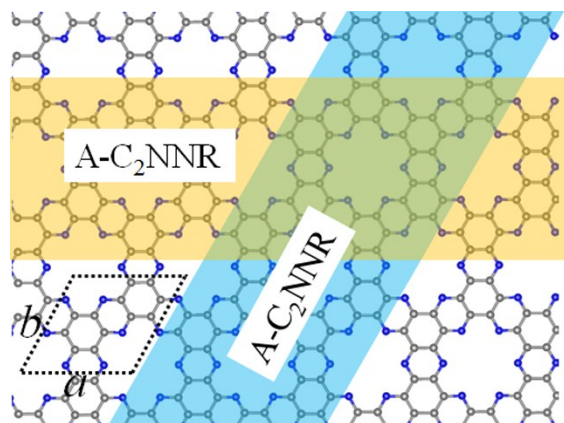

**Figure S3.** The atomic structure of armchair nanoribbons slicing along a and b direction of unit cell.

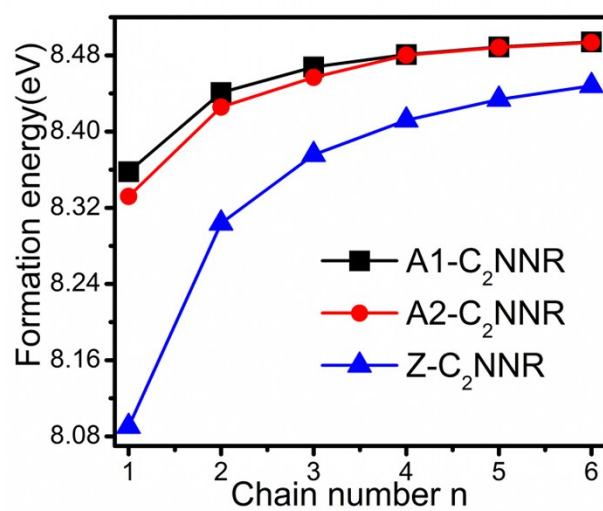

**Figure S4.** The formation energy of different C<sub>2</sub>NNRs depending on the chain number n.

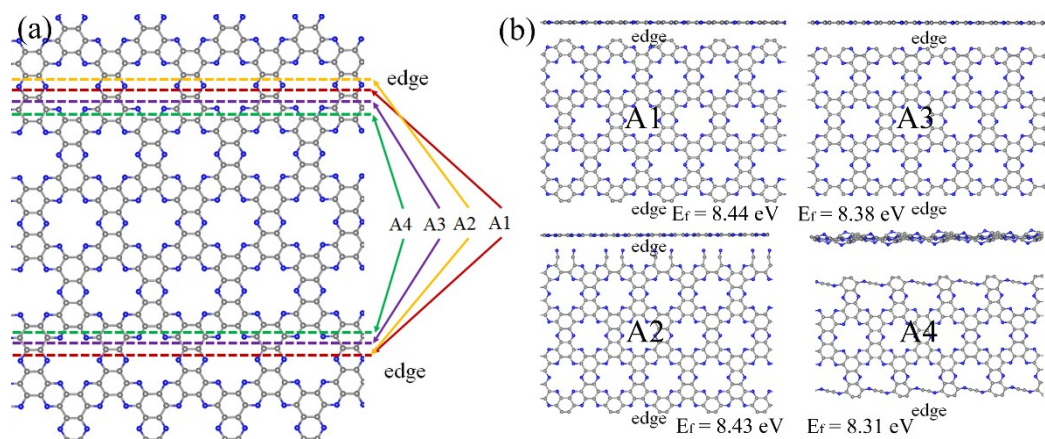

**Figure S5.** (a) The atomic structure of different armchair nanoribbons, named as A1, A2, A3 and A4  $C_2$ NNRs. (b) The optimized atomic structures of armchair nanoribbons.

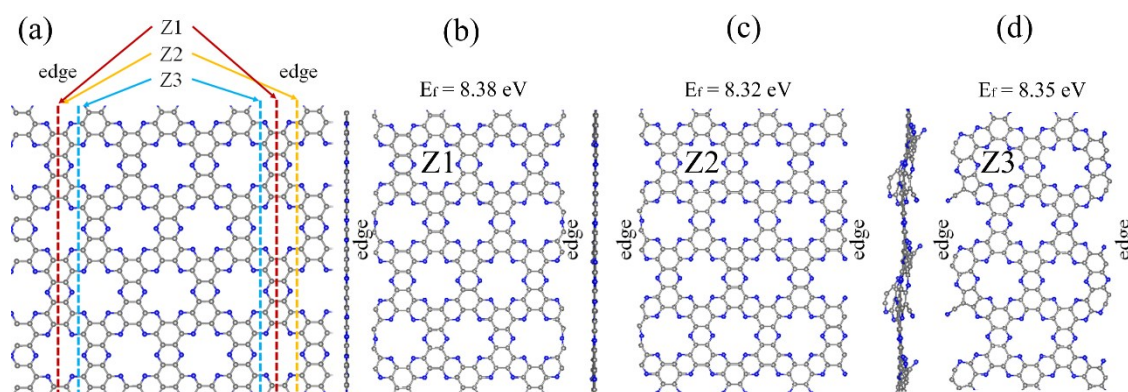

**Figure S6.** (a) The atomic structure of different zigzag nanoribbons, named as Z- $C_2$ NNRs. The optimized atomic structures of (b) Z1- $C_2$ NNR, (c) Z2- $C_2$ NNR and (d) Z3- $C_2$ NNR.

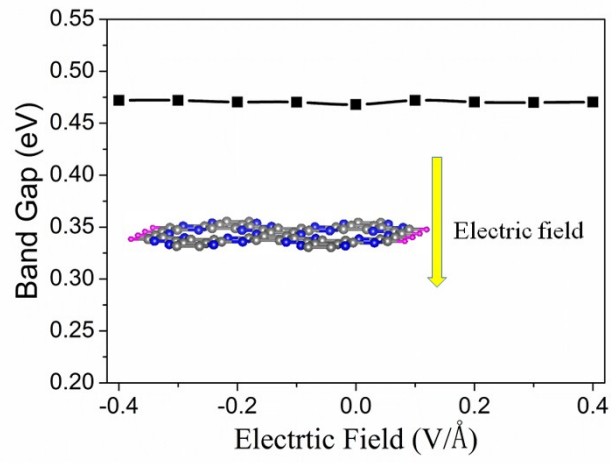

**Figure S7.** The band gap of H-Z-C<sub>2</sub>NNR depending on the vertical electric field.
